# Supplementary material for: Quantitative Image Analysis of Axonal Morphology in In Vivo Model
Source: MDPI journal article supplement (doi:10.3390/mps6060116), 2023-12-01
Supplement: s1 [file s1]

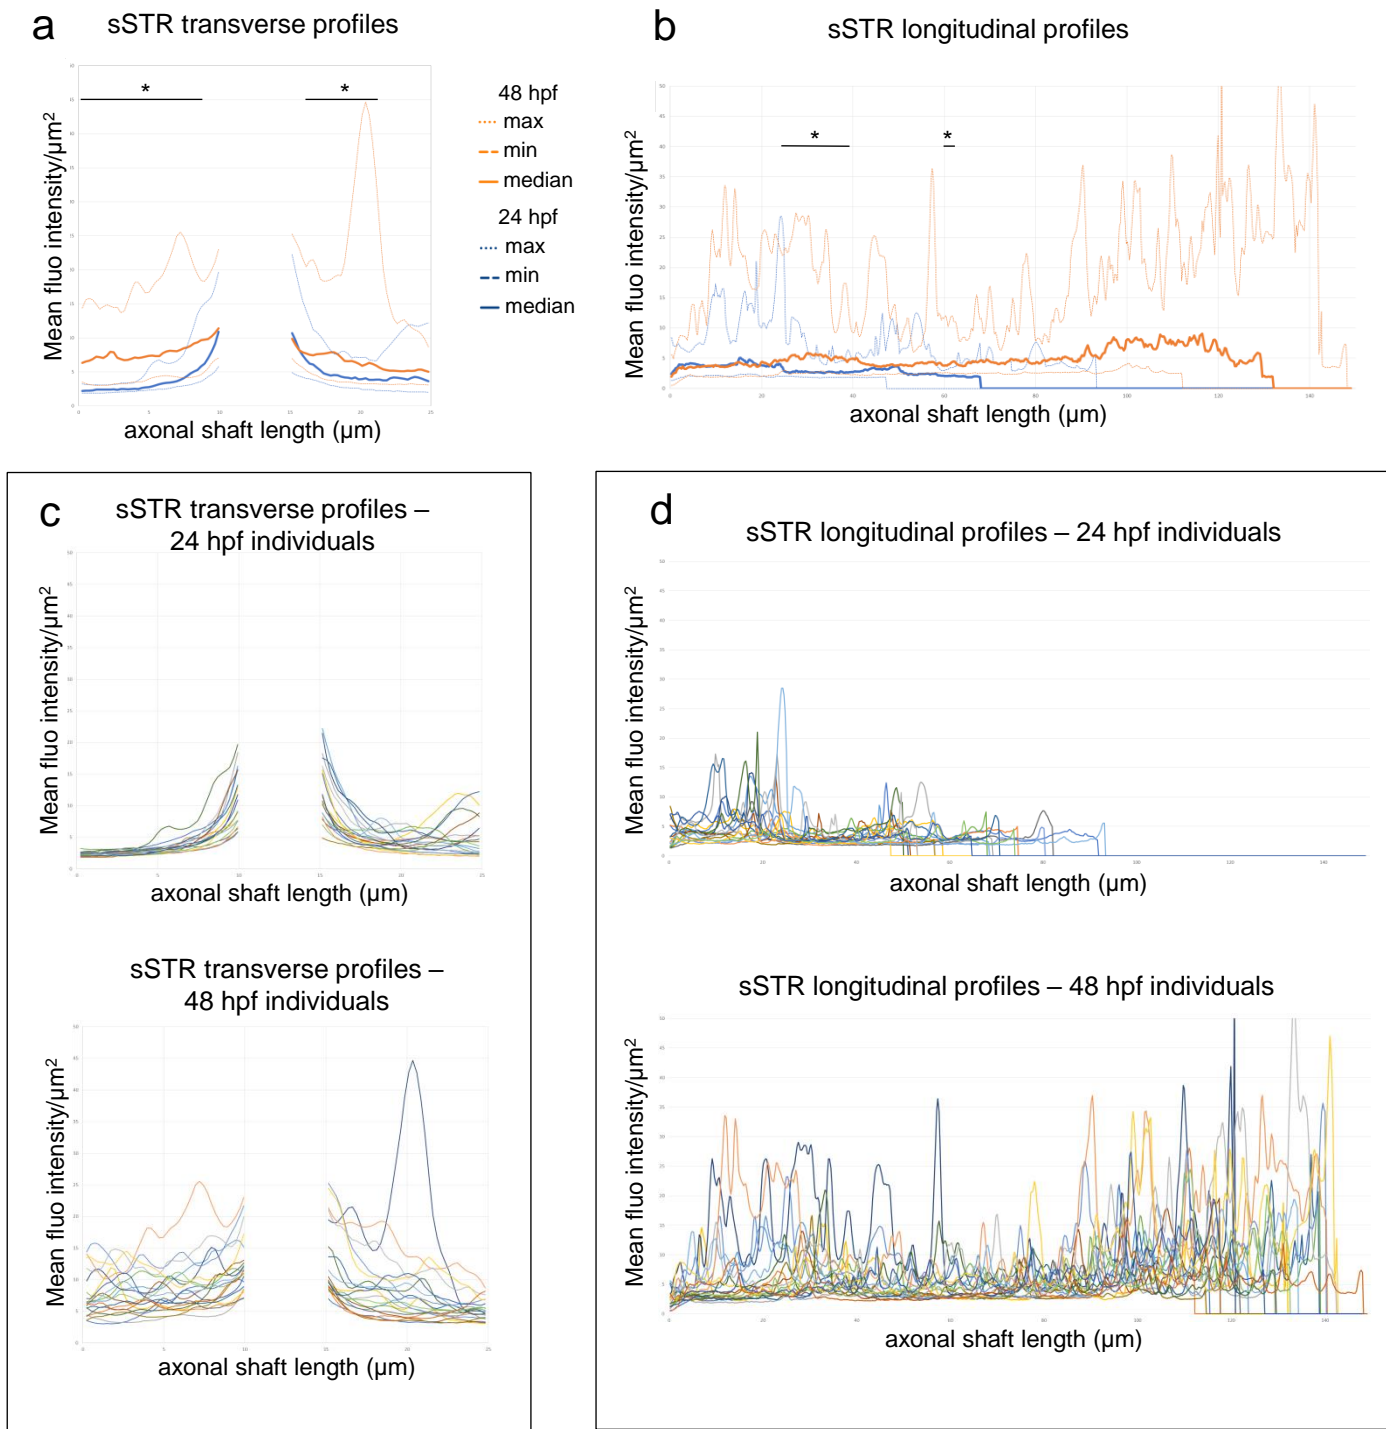

**Figure S1.** Median, min and max values obtained for mean fluorescence intensity /  $\mu\text{m}^2$  (top panels) calculated from the transverse (a) and longitudinal (b) profiles of 24 hpf (dark blue) and 48 hpf axons (orange). \*, significantly different profiles using Mann-Whitney tests corrected for multiple comparisons (individual pvalues in Tables S3 and S4).

Individual transverse (c) and longitudinal (d) profiles from 19 fluorescence intensity images of 24 hpf axons and 20 fluorescence intensity images of 48 hpf axons.

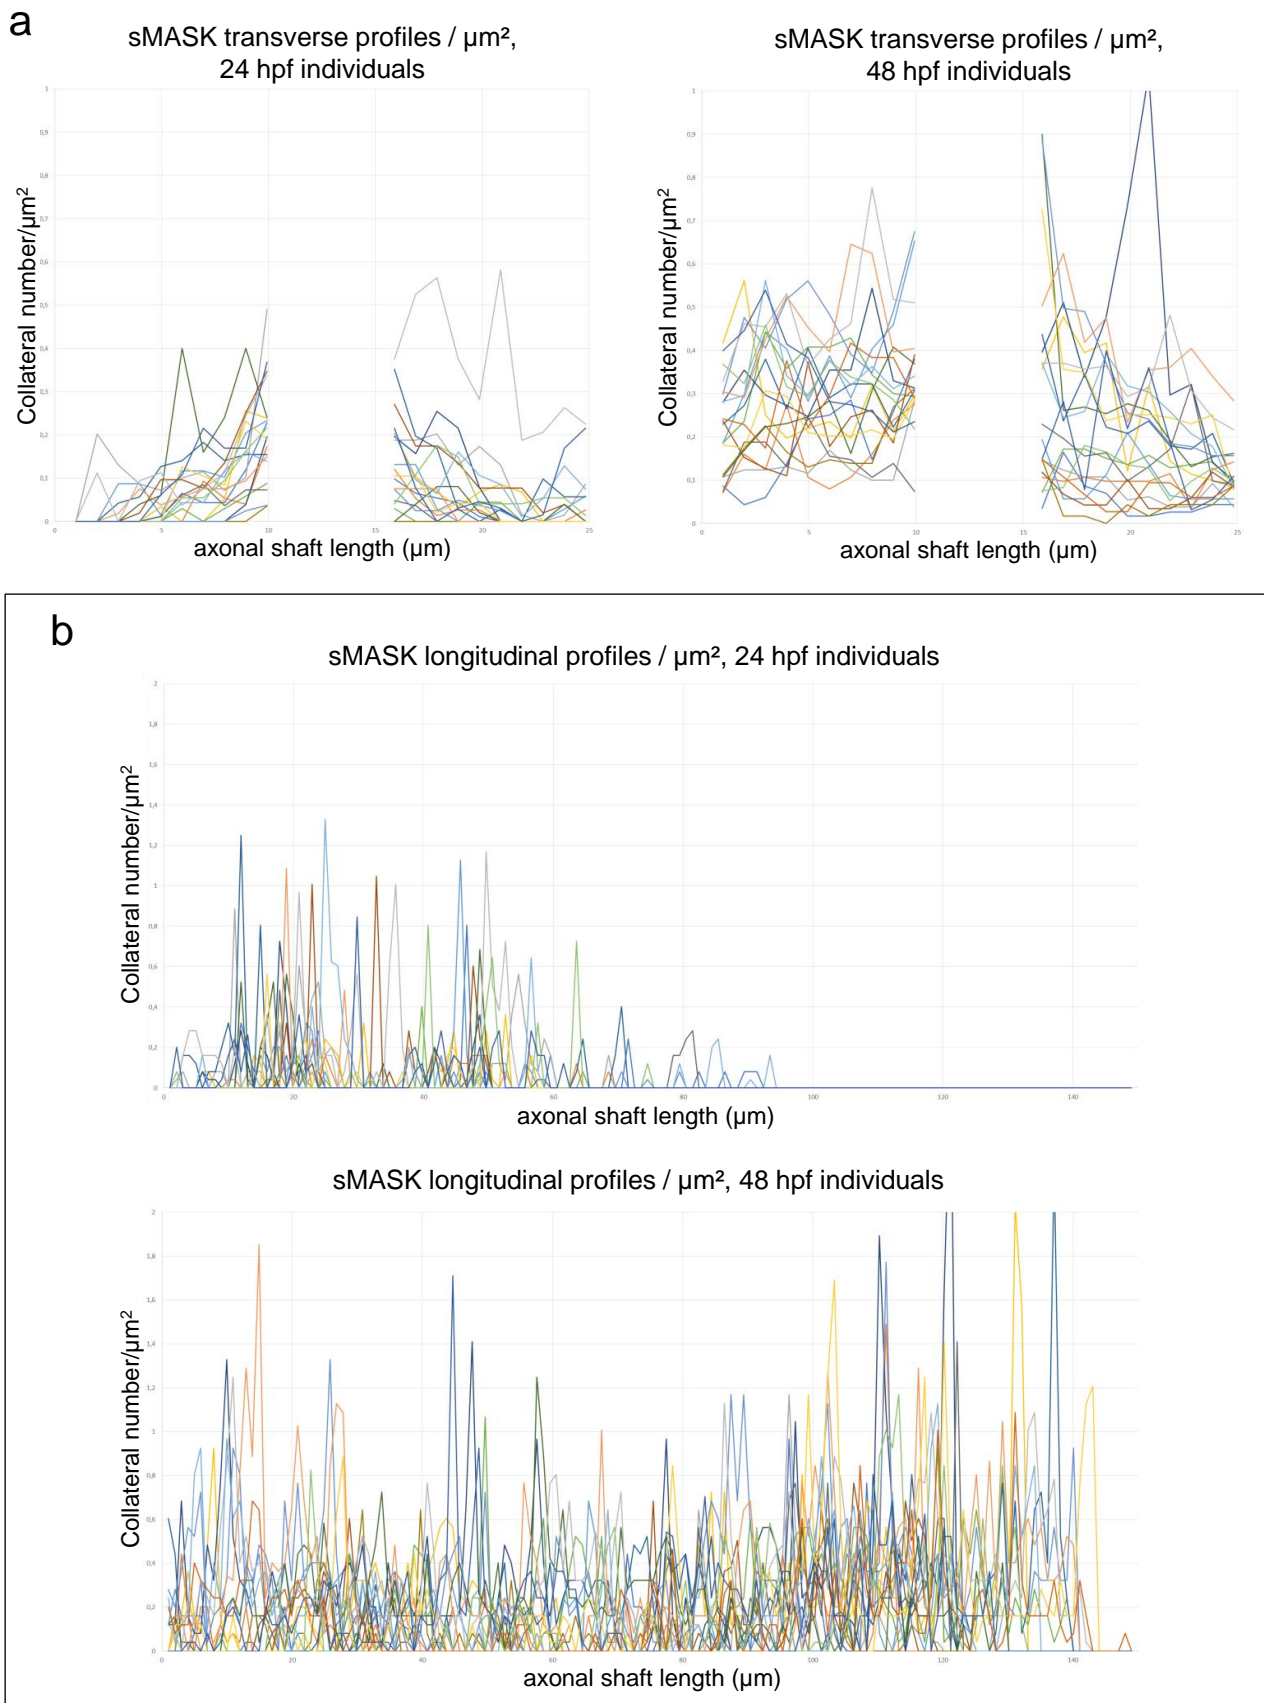

**Figure S2.** Individual transverse (a) and longitudinal (b) profiles from 19 mask images of 24 hpf axons and 20 mask images of 48 hpf axons.
